# Supplementary material for: Globalization and changing trends of biomedical research output
Source: JCI journal article supplement (doi:10.1172/jci.insight.95206), 2017-06-14
Supplement: sd1 [file 1]

**Supplemental Table 1**

| Journal tier | Category     | Pub Year    | Total publications | Single country | % Single country | Intl collab | %Intl collab | US only     | % US only  | US+ Intl   | %US+ Intl  | CN only   | % CN only   | CN+ Intl  | % CN+ Intl  |
|--------------|--------------|-------------|--------------------|----------------|------------------|-------------|--------------|-------------|------------|------------|------------|-----------|-------------|-----------|-------------|
| Upper        | basic        | 2000        | 2093               | 1499           | 72%              | 594         | 28%          | 987         | 47%        | 258        | 12%        | 8         | 0.4%        | 3         | 0.1%        |
| Upper        | clinical     | 2000        | 1137               | 884            | 78%              | 253         | 22%          | 436         | 38%        | 69         | 6%         | 4         | 0.4%        | 0         | 0.0%        |
|              | <b>Total</b> | <b>2000</b> | <b>3230</b>        | <b>2383</b>    | <b>74%</b>       | <b>847</b>  | <b>26%</b>   | <b>1423</b> | <b>44%</b> | <b>327</b> | <b>10%</b> | <b>12</b> | <b>0.4%</b> | <b>3</b>  | <b>0.1%</b> |
| Upper        | basic        | 2005        | 2070               | 1317           | 64%              | 753         | 36%          | 878         | 42%        | 324        | 16%        | 11        | 0.4%        | 8         | 0.3%        |
| Upper        | clinical     | 2005        | 710                | 460            | 65%              | 250         | 35%          | 286         | 40%        | 74         | 10%        | 1         | 0.0%        | 3         | 0.1%        |
|              | <b>Total</b> | <b>2005</b> | <b>2780</b>        | <b>1777</b>    | <b>64%</b>       | <b>1003</b> | <b>36%</b>   | <b>1164</b> | <b>42%</b> | <b>398</b> | <b>14%</b> | <b>12</b> | <b>0.4%</b> | <b>11</b> | <b>0.4%</b> |
| Upper        | basic        | 2010        | 1862               | 1125           | 60%              | 737         | 40%          | 773         | 42%        | 351        | 19%        | 21        | 0.9%        | 18        | 0.7%        |
| Upper        | clinical     | 2010        | 599                | 338            | 56%              | 261         | 44%          | 226         | 38%        | 91         | 15%        | 2         | 0.1%        | 2         | 0.1%        |
|              | <b>Total</b> | <b>2010</b> | <b>2461</b>        | <b>1463</b>    | <b>59%</b>       | <b>998</b>  | <b>41%</b>   | <b>999</b>  | <b>41%</b> | <b>442</b> | <b>18%</b> | <b>23</b> | <b>0.9%</b> | <b>20</b> | <b>0.8%</b> |
| Upper        | basic        | 2013        | 1948               | 1136           | 58%              | 812         | 42%          | 782         | 40%        | 384        | 20%        | 26        | 1.0%        | 49        | 1.9%        |
| Upper        | clinical     | 2013        | 606                | 337            | 56%              | 269         | 44%          | 194         | 32%        | 92         | 15%        | 10        | 0.4%        | 4         | 0.2%        |
|              | <b>Total</b> | <b>2013</b> | <b>2554</b>        | <b>1473</b>    | <b>58%</b>       | <b>1081</b> | <b>42%</b>   | <b>976</b>  | <b>38%</b> | <b>476</b> | <b>19%</b> | <b>36</b> | <b>1.4%</b> | <b>53</b> | <b>2.1%</b> |
| Upper        | basic        | 2015        | 1947               | 1052           | 54%              | 895         | 46%          | 741         | 38%        | 421        | 22%        | 30        | 1.2%        | 42        | 1.6%        |
| Upper        | clinical     | 2015        | 642                | 329            | 51%              | 313         | 49%          | 214         | 33%        | 106        | 17%        | 5         | 0.2%        | 5         | 0.2%        |
|              | <b>Total</b> | <b>2015</b> | <b>2589</b>        | <b>1381</b>    | <b>53%</b>       | <b>1208</b> | <b>47%</b>   | <b>955</b>  | <b>37%</b> | <b>527</b> | <b>20%</b> | <b>35</b> | <b>1.4%</b> | <b>47</b> | <b>1.8%</b> |
| Journal tier | Category     | Pub Year    | Total publications | Single country | % Single country | Intl collab | %Intl collab | US only     | % US only  | US+ Intl   | %US+ Intl  | CN only   | % CN only   | CN+ Intl  | % CN+ Intl  |
| Mid          | basic        | 2000        | 580                | 415            | 72%              | 165         | 28%          | 172         | 30%        | 34         | 6%         | 0         | 0.0%        | 0         | 0.0%        |
| Mid          | clinical     | 2000        | 603                | 516            | 86%              | 87          | 14%          | 198         | 33%        | 20         | 3%         | 1         | 0.1%        | 0         | 0.0%        |
|              | <b>Total</b> | <b>2000</b> | <b>1183</b>        | <b>931</b>     | <b>79%</b>       | <b>252</b>  | <b>21%</b>   | <b>370</b>  | <b>31%</b> | <b>54</b>  | <b>5%</b>  | <b>1</b>  | <b>0.1%</b> | <b>0</b>  | <b>0.0%</b> |
| Mid          | basic        | 2005        | 915                | 662            | 72%              | 253         | 28%          | 232         | 25%        | 50         | 5%         | 2         | 0.1%        | 2         | 0.1%        |
| Mid          | clinical     | 2005        | 580                | 446            | 77%              | 134         | 23%          | 180         | 31%        | 30         | 5%         | 0         | 0.0%        | 0         | 0.0%        |
|              | <b>Total</b> | <b>2005</b> | <b>1495</b>        | <b>1108</b>    | <b>74%</b>       | <b>387</b>  | <b>26%</b>   | <b>412</b>  | <b>28%</b> | <b>80</b>  | <b>5%</b>  | <b>2</b>  | <b>0.1%</b> | <b>2</b>  | <b>0.1%</b> |
| Mid          | basic        | 2010        | 796                | 516            | 65%              | 280         | 35%          | 211         | 27%        | 63         | 8%         | 11        | 0.9%        | 10        | 0.8%        |
| Mid          | clinical     | 2010        | 451                | 342            | 76%              | 109         | 24%          | 160         | 35%        | 24         | 5%         | 2         | 0.2%        | 1         | 0.1%        |
|              | <b>Total</b> | <b>2010</b> | <b>1247</b>        | <b>858</b>     | <b>69%</b>       | <b>389</b>  | <b>31%</b>   | <b>371</b>  | <b>30%</b> | <b>87</b>  | <b>7%</b>  | <b>13</b> | <b>1.0%</b> | <b>11</b> | <b>0.9%</b> |
| Mid          | basic        | 2013        | 881                | 597            | 68%              | 284         | 32%          | 248         | 28%        | 78         | 9%         | 24        | 1.8%        | 15        | 1.1%        |
| Mid          | clinical     | 2013        | 465                | 367            | 79%              | 98          | 21%          | 212         | 46%        | 33         | 7%         | 2         | 0.1%        | 4         | 0.3%        |
|              | <b>Total</b> | <b>2013</b> | <b>1346</b>        | <b>964</b>     | <b>72%</b>       | <b>382</b>  | <b>28%</b>   | <b>460</b>  | <b>34%</b> | <b>111</b> | <b>8%</b>  | <b>26</b> | <b>1.9%</b> | <b>19</b> | <b>1.4%</b> |
| Mid          | basic        | 2015        | 761                | 546            | 72%              | 215         | 28%          | 194         | 25%        | 52         | 7%         | 35        | 3.1%        | 14        | 1.2%        |
| Mid          | clinical     | 2015        | 381                | 296            | 78%              | 85          | 22%          | 184         | 48%        | 26         | 7%         | 1         | 0.1%        | 2         | 1.4%        |
|              | <b>Total</b> | <b>2015</b> | <b>1142</b>        | <b>842</b>     | <b>74%</b>       | <b>300</b>  | <b>26%</b>   | <b>378</b>  | <b>33%</b> | <b>78</b>  | <b>7%</b>  | <b>36</b> | <b>3.2%</b> | <b>16</b> | <b>1.4%</b> |

**Supplemental Table 2**

| Year | Journal Tier | Category | 21+       | 11+       | 6+        | 1+         | Total Papers |
|------|--------------|----------|-----------|-----------|-----------|------------|--------------|
| 2000 | High         | basic    | 40 (2%)   | 145 (7%)  | 643 (31%) | 1265 (60%) | 2093         |
| 2000 | High         | clinical | 10 (1%)   | 148 (13%) | 437 (38%) | 542 (48%)  | 1137         |
| 2005 | High         | basic    | 82 (4%)   | 247 (12%) | 660 (32%) | 1081 (52%) | 2070         |
| 2005 | High         | clinical | 37 (5%)   | 223 (31%) | 289 (41%) | 161 (23%)  | 710          |
| 2010 | High         | basic    | 146 (8%)  | 363 (19%) | 649 (35%) | 704 (38%)  | 1862         |
| 2010 | High         | clinical | 87 (15%)  | 219 (37%) | 192 (32%) | 101 (17%)  | 599          |
| 2013 | High         | basic    | 186 (10%) | 499 (26%) | 680 (35%) | 583 (30%)  | 1948         |
| 2013 | High         | clinical | 139 (23%) | 242 (40%) | 139 (23%) | 86 (14%)   | 606          |
| 2015 | High         | basic    | 264 (14%) | 511 (26%) | 696 (36%) | 476 (24%)  | 1947         |
| 2015 | High         | clinical | 181 (28%) | 229 (36%) | 159 (25%) | 73 (11%)   | 642          |
| 2000 | Mid          | basic    | 0 (0%)    | 24 (4%)   | 211 (36%) | 345 (59%)  | 580          |
| 2000 | Mid          | clinical | 1 (0%)    | 20 (3%)   | 177 (29%) | 405 (67%)  | 603          |
| 2005 | Mid          | basic    | 3 (0%)    | 82 (9%)   | 433 (47%) | 397 (43%)  | 915          |
| 2005 | Mid          | clinical | 5 (1%)    | 46 (8%)   | 208 (36%) | 321 (55%)  | 580          |
| 2010 | Mid          | basic    | 3 (0%)    | 124 (16%) | 398 (50%) | 271 (34%)  | 796          |
| 2010 | Mid          | clinical | 8 (2%)    | 59 (13%)  | 189 (42%) | 195 (43%)  | 451          |
| 2013 | Mid          | basic    | 5 (1%)    | 142 (16%) | 446 (51%) | 288 (33%)  | 881          |
| 2013 | Mid          | clinical | 6 (1%)    | 51 (11%)  | 181 (39%) | 227 (49%)  | 465          |
| 2015 | Mid          | basic    | 3 (0%)    | 127 (17%) | 393 (52%) | 238 (31%)  | 761          |
| 2015 | Mid          | clinical | 18 (5%)   | 58 (15%)  | 173 (45%) | 132 (35%)  | 381          |

**Supplemental Table 3**

| <b>Rank</b>         | <b>2000</b> |     | <b>2005</b> |     | <b>2010</b> |     | <b>2013</b> |     | <b>2015</b> |     |
|---------------------|-------------|-----|-------------|-----|-------------|-----|-------------|-----|-------------|-----|
| <b>1</b>            | US          | 370 | US          | 412 | US          | 371 | US          | 460 | US          | 378 |
| <b>2</b>            | GB          | 248 | GB          | 221 | GB          | 117 | GB          | 110 | GB          | 82  |
| <b>3</b>            | DE          | 54  | DE          | 73  | DE          | 43  | CA          | 60  | CA          | 48  |
| <b>4</b>            | IT          | 34  | CA          | 54  | CA,FR       | 38  | JP          | 48  | JP          | 38  |
| <b>5</b>            | FR          | 33  | IT,FR       | 47  | JP          | 34  | FR          | 41  | CN          | 36  |
| <b>6</b>            | CA          | 28  | JP          | 44  | AU          | 31  | DE          | 40  | DE,FR       | 30  |
| <b>7</b>            | JP          | 27  | NL          | 36  | NL          | 29  | CN          | 26  | NL          | 27  |
| <b>8</b>            | NL          | 22  | IL          | 23  | IT          | 28  | AU          | 24  | IT          | 24  |
| <b>9</b>            | AU          | 13  | AU,SE       | 17  | ES,SE       | 14  | NL          | 21  | ES          | 23  |
| <b>10</b>           | CH,ES,FI    | 12  | CH          | 16  | CH,CN       | 13  | IT          | 20  | AU          | 18  |
|                     |             |     |             |     |             |     |             |     |             |     |
| <b>Total papers</b> | 1183        |     | 1495        |     | 1247        |     | 1346        |     | 1142        |     |
| <b>%US</b>          | 31%         |     | 28%         |     | 30%         |     | 34%         |     | 33%         |     |

## Supplemental Information:

### Determination of Citation Numbers:

Citations were manually identified by reviewing the journal's table of contents to identify research papers (including brief reports and research letters. Non-research papers (eg review articles, commentaries or editorials, non-research letters, etc) were excluded. The PDF or HTML version of each article was examined and citation characteristics, including number of authors, and the nationalities of the corresponding author, and of all other authors, were recorded. If a corresponding author listed more than one affiliation, the affiliation matching the email address was recorded. If other authors listed more than one affiliation, the first affiliation was recorded. If no corresponding author was identified, the last author's affiliation was used. For papers authored by consortia or groups, only the affiliations of those authors included in the author block were recorded; if the paper was authored corporately, the writing committee's affiliations were recorded if present; otherwise the citation was excluded from analysis.

### Statistical Methods:

The slopes for the percent of manuscripts/year were estimated through a linear regression analysis. The significance of the slope for the regression line was calculated using the one sample hypothesis testing for linear correlation and a t-test with null hypothesis that the slope of line regression is equal to zero. The table below lists the calculated values:

| Author-based           | Journal Impact | Slope | p-value |
|------------------------|----------------|-------|---------|
| US-only                | Top            | -0.46 | 0.007   |
|                        | Mid            | 0.24  | 0.278   |
| US-Int                 | Top            | 0.67  | 0.001   |
|                        | Mid            | 0.19  | 0.050   |
| China-only             | Top            | 0.08  | 0.017   |
|                        | Mid            | 0.19  | 0.036   |
| China-Int              | Top            | 0.13  | 0.028   |
|                        | Mid            | 0.11  | 0.008   |
| US-only + US-Int       | Top            | 0.22  | 0.165   |
|                        | Mid            | 0.43  | 0.145   |
| China-only + China-Int | Top            | 0.21  | 0.001   |
|                        | Mid            | 0.32  | 0.024   |
